# Supplementary material for: A propensity score-matched retrospective study on sacubitril/valsartan use and 6-month readmission rates in patients with acute heart failure
Source: PeerJ journal article supplement (doi:10.7717/peerj.20055), 2025-09-29
Supplement: code_book.docx [file code_book.docx]

Code:

| Code | 0 | 1 |
| --- | --- | --- |
| Hypertension | no | yes |
| Diabetes | no | yes |
| Six-mon | Not readmitted within 6 months | Readmission within 6 months |
| Gender | female | male |
| Smoke | no | yes |
| Medicine(including nxt, inj, CCB, ACEI, ARB, β-block) | Not use | use |
