# Supplementary material for: A propensity score-matched retrospective study on sacubitril/valsartan use and 6-month readmission rates in patients with acute heart failure
Source: PeerJ journal article supplement (doi:10.7717/peerj.20055), 2025-09-29
Supplement: raw_data_2.xlsx [file raw_data_2.xlsx]

## Sheet: Sheet1
ID	hypertension	diabetes	six-mon	gender	age	smoke	BMI	BNP	CR	ALT	AST	TG	HDL	LDL	nxt	lnj	CCB	ACEI	ARB	Bblock
155	1	0	0	0	88	0	20	607.7	170.8	13.2	29.6	1.35	0.41	1.86	0	1	0	0	0	0
163	1	1	0	1	78	1	25.4028	530.2	134.6	75.9	99.1	1.72	0.42	3.47	0	1	0	0	0	0
75	0	0	0	1	50	1	34.2561	1444.7	52.7	25.4	37.1	0.638	0.48	0.95	0	1	0	0	0	1
81	0	0	0	1	67	1	14.6939	700.8	105.6	1025.5	1425.4	1.29	0.49	2.07	0	1	0	0	0	0
19	1	1	1	1	82	1	20.0474	1502.2	72.7	9.1	23.5	1.041	0.563	1.966	0	1	0	0	1	0
83	1	0	0	0	74	0	27.3438	451.3	82.9	45.8	74.4	1.041	0.695	0.983	0	1	0	0	0	0
102	0	0	0	1	67	1	22.4913	1322.2	258.6	14.5	25.1	1.718	0.721	3.057	0	1	0	0	0	0
48	1	0	0	1	73	1	23.1405	503.7	143.5	43.2	16.4	0.774	0.723	1.858	0	1	0	0	1	0
164	0	0	0	0	47	0	24.3865	547	62.3	16.8	25.9	1.79	0.74	2.55	0	1	0	0	0	0
120	1	0	0	1	79	1	21.1505	1975.8	80.8	8.9	19.3	0.73	0.77	1.95	0	1	0	0	0	0
2	1	1	0	1	87	0	30.1162	815.5	112.8	17.4	19.6	0.68	0.798	1.912	0	1	0	0	0	1
119	1	1	0	1	73	1	29.3013	603.2	82.9	13.7	21.9	0.73	0.8	1.48	0	1	0	0	0	0
144	0	0	0	0	70	0	19.313	1191.6	62	55.3	36.5	1.14	0.8	1.56	0	1	0	0	0	0
67	0	0	0	1	88	1	23.1837	659.3	93.2	12.5	21	0.599	0.81	1.61	0	1	0	0	0	0
105	0	1	0	1	61	0	21.2803	4784.8	91.6	50.8	72.4	0.615	0.825	2.265	0	1	0	1	0	0
156	0	0	0	1	88	0	17.1468	201.4	187.6	18.4	44.3	1.37	0.83	2.47	0	0	0	0	0	0
36	1	0	0	1	85	1	22.4913	639.4	88.8	16.8	26.9	1.402	0.84	2.19	0	0	1	1	1	0
104	1	1	0	0	84	0	25.3333	731.4	126.9	26.7	26	1.083	0.84	1.38	0	1	1	1	0	0
90	1	0	0	0	78	0	31.2175	850.8	115.9	20	24.3	1.19	0.85	2.78	0	1	0	0	1	0
96	0	0	0	0	51	0	21.4844	1881.4	66	23.5	35.7	0.693	0.86	1.34	0	1	0	0	0	0
159	0	0	0	0	94	0	15.5556	3163.4	95.4	12.2	32.7	1.54	0.86	2.63	0	1	0	0	0	0
126	1	0	0	1	29	0	36.2959	1391.7	243.2	16.7	16.3	0.8	0.91	2.3	0	1	0	0	0	0
32	1	0	0	1	93	0	15.7558	930.2	75.9	10	24.6	0.406	0.927	0.977	0	1	0	0	0	0
80	0	0	0	1	61	1	22.2291	2109.8	71.6	26.3	30.5	0.996	0.949	2.124	0	1	0	0	0	0
108	1	0	0	1	75	1	24.974	1450.8	148.1	1676.6	1956	0.71	0.97	2.27	0	0	1	0	0	0
4	1	1	0	1	78	1	23.3844	628.7	74.9	55.3	27.1	0.932	0.977	1.866	0	1	0	0	1	0
169	1	1	0	0	93	0	18.7305	940.5	191.2	5.5	11.7	2.28	0.98	3.28	0	1	1	0	0	1
69	0	0	0	1	78	1	23.1837	1399.9	96.1	22.5	16.5	1.231	0.986	1.926	0	1	0	0	0	0
73	0	0	0	1	42	1	24.0346	770	68.9	54.9	38.4	0.777	0.987	1.61	0	1	0	1	0	1
101	0	0	0	1	91	0	17.7778	1037.7	107	21.7	36.6	0.742	0.992	1.894	0	1	0	0	0	0
42	1	0	0	1	52	0	23.5294	944.3	94.4	36.8	29.4	2.009	0.996	2.668	0	1	1	1	1	1
111	0	0	0	1	83	1	19.0311	855.4	213.4	17.5	25.9	0.509	1	0.95	0	1	1	0	0	0
131	1	0	0	1	64	0	26.5731	965.3	85.3	17	17.9	0.88	1.04	1.84	0	1	0	0	0	0
170	0	0	0	1	40	0	30.0613	321.9	91.7	45.6	31.4	2.31	1.04	3.69	0	1	0	0	0	0
71	0	0	0	1	91	1	20.3074	646.1	84.5	7.1	15.9	0.977	1.041	2.256	0	1	0	0	0	0
35	1	0	0	0	71	0	31.2175	491.4	76.8	20.6	21.6	0.707	1.056	1.369	0	1	1	0	1	1
52	1	0	0	0	92	0	27.1203	432	109.1	15.5	20.9	2.859	1.094	3.187	0	1	1	0	1	0
65	0	0	0	1	69	1	22.1453	1605.7	117.4	28.5	46.4	0.715	1.119	1.864	0	1	1	1	0	0
165	1	0	0	0	88	0	23.3355	1591.6	144.9	151.7	236.5	1.83	1.12	4.04	0	1	0	0	0	0
166	0	0	0	0	67	0	23.9682	587.8	100.1	16.8	18.6	1.9	1.13	3.4	0	1	0	0	0	0
5	1	1	0	0	68	0	25.0361	821.4	70.7	60.2	49.1	1.11	1.144	1.678	0	1	0	1	0	1
85	1	0	0	0	85	0	23.3056	445.2	71.3	18.8	23.3	1.094	1.151	3.098	0	1	0	0	1	1
63	1	0	0	1	38	1	23.5294	1278.6	91.2	23.2	15.4	1.379	1.154	2.646	0	1	0	0	0	1
168	1	0	0	1	36	0	27.6817	756.4	520.6	192.1	52.6	2.24	1.16	2.86	0	0	1	0	0	0
54	1	0	0	0	70	0	22.0317	642.4	75.4	50.3	34.8	0.953	1.167	3.183	0	1	1	0	1	0
51	1	0	0	0	49	0	21.4844	2357.2	68.7	24.8	23.8	0.955	1.168	2.078	0	1	1	1	1	1
72	0	0	0	0	78	0	26.5021	590.9	48	27	29.9	0.934	1.174	2.48	0	1	0	0	0	1
77	0	0	0	1	52	0	24.2215	515.5	95.7	20.2	39.3	0.675	1.181	2.143	0	1	1	1	0	1
93	0	0	0	1	81	0	20.1348	854.1	118.3	24.7	39.6	0.545	1.201	1.53	0	1	0	1	1	1
132	1	0	0	1	66	1	18.5185	955.7	241.6	16.8	29.3	0.89	1.21	1.08	0	1	0	0	0	0
23	1	0	0	0	22	0	21.4844	1793	225.9	11	14.8	2.395	1.243	3.092	0	1	1	0	1	0
94	0	0	0	0	66	0	17.6254	15075.3	112.7	516.7	1080.8	1.061	1.26	2.66	0	1	0	0	0	0
49	1	0	0	1	82	0	20.7008	2679.8	202.5	42.8	37.6	0.5	1.277	1.696	0	1	1	1	1	0
21	1	0	0	1	82	0	23.1837	1574.1	104.6	15.2	24.8	0.643	1.309	2.532	0	1	1	0	1	0
6	1	1	0	0	76	0	22.5069	521	68.6	27.7	24.5	1.221	1.337	1.482	0	1	0	0	1	1
22	1	0	0	0	84	0	22.8928	920.6	151	6	11.3	1.085	1.338	2.482	0	1	1	1	1	0
66	0	0	0	0	89	0	33.737	4656.3	50.7	18.4	28.2	1.006	1.34	2.74	0	1	0	0	0	1
147	1	0	0	1	81	1	18.2222	13688.2	297.8	591.8	1079.6	1.17	1.34	2.73	0	1	0	0	0	0
20	1	0	0	0	86	0	16.6493	968	61.7	13.1	25.9	0.495	1.42	2.02	0	1	0	0	1	0
122	1	0	0	0	86	0	15.7558	848.5	85.1	19.9	29.7	0.73	1.44	2.73	0	1	0	0	0	0
82	1	0	0	0	89	0	23.4375	1111.8	120.8	20.7	32.4	0.553	1.445	1.744	0	1	1	0	1	1
141	1	0	0	1	73	1	20.4152	492.3	73.7	39.5	34.9	1.12	1.45	2.22	0	1	0	0	0	0
130	0	0	0	0	85	0	22.2222	547.5	104.7	17	32	0.86	1.47	2.41	0	1	0	0	0	0
143	0	0	0	0	59	0	25.5859	1016.8	88.4	26.6	34.4	1.13	1.52	2.31	0	1	0	0	0	0
78	0	0	0	0	83	0	17.8571	1022	97.6	22.3	30.9	0.855	1.621	2.913	0	1	0	0	1	0
17	1	1	0	1	47	1	27.7344	661	505.8	26.5	40.4	2.307	1.66	4.7	0	1	1	0	0	1
174	0	0	0	0	72	0	23.8549	562.4	193.7	17.5	27.6	2.58	1.76	5.98	0	1	0	0	0	0
3	1	1	0	1	69	0	22.7732	680.4	50.3	17.3	26.8	0.815	1.955	2.523	0	1	1	0	1	0
92	0	0	1	1	51	1	23.1837	886	62.5	27.8	31.7	0.517	0.473	1.066	0	1	0	0	0	1
34	1	0	1	1	83	0	22.4913	563	69	43.3	31.1	0.578	0.897	1.676	0	1	1	1	0	0
106	1	0	1	0	95	0	22.8928	994.9	66.6	10.3	14	0.782	0.916	1.577	0	1	0	1	0	0
91	0	0	1	0	86	1	22.8928	2174.2	102.5	7	20.2	0.534	0.99	1.3	0	1	0	0	0	0
57	1	0	1	1	87	1	21.0077	617.7	84.1	20.7	23.9	0.627	1.038	1.526	0	0	1	0	0	0
18	1	1	1	0	82	0	28.6813	423.3	68.6	46.2	34.9	0.606	1.049	1.704	0	1	0	0	1	1
68	0	0	1	1	65	1	23.1837	1387.1	91.5	32.1	36.1	0.942	1.05	2.69	0	1	1	1	0	1
95	0	0	1	1	92	1	20.8828	701.5	67.4	587.5	1158.8	0.384	1.066	0.419	0	1	0	1	0	0
11	0	1	1	0	81	0	21.3333	2786	95.4	16.3	25.2	1.615	1.087	2.104	0	1	0	1	0	0
50	1	0	1	0	87	0	21.7784	478.4	77.8	17	35	0.539	1.139	1.481	0	1	0	1	1	0
43	1	0	1	1	92	0	22.0386	765.4	109.9	14.9	17.4	0.998	1.147	1.711	0	1	0	0	1	1
61	1	0	1	0	71	0	16.2177	431.7	79.9	15.8	22.6	1.364	1.283	2.628	0	1	1	0	1	0
13	1	1	1	0	60	0	26.6667	995.6	67.5	57.7	42.8	1.985	1.373	4.014	0	1	0	1	0	0
70	0	0	1	0	53	0	19.9219	643.7	57.8	11.9	27.7	0.969	1.392	2.085	0	1	0	0	0	0
26	1	0	1	0	89	0	21.4844	760.5	67.7	21.8	18.8	0.781	1.394	1.59	0	1	0	0	0	0
24	1	0	1	0	88	1	22.8928	13632.7	110.9	8.8	21	0.974	1.484	2.292	0	1	0	1	0	0
41	1	0	1	0	79	0	17.2635	878.9	181.5	16.5	26.7	0.975	1.51	1.657	0	1	1	0	1	0
25	1	0	1	1	75	1	23.03	483.8	60.7	15.1	15.1	0.817	1.53	2.004	0	1	1	0	1	0
1	0	1	1	1	69	1	23.1837	2197.3	66.1	14.7	10.7	0.746	1.658	1.683	0	1	0	0	0	0
28	1	0	1	0	90	0	22.8928	874.2	89.8	12.4	23.9	0.626	1.673	2.292	0	1	0	0	0	1
38	1	0	1	0	86	0	14.1519	1941.3	66.9	30.2	43.4	0.565	1.77	2.19	0	1	0	0	0	1
31	1	0	1	0	82	0	17.5781	431.1	89.6	156.5	100.4	0.587	2.257	1.955	0	0	0	0	0	0
76	0	0	0	1	63	1	20.8611	1715.1	86.4	37.4	19.3	0.486	0.663	1.548	1	1	0	0	0	1
79	0	0	0	1	52	1	22.3765	2230.8	155.9	293.6	288	0.567	0.686	1.32	1	1	1	0	0	1
148	0	0	0	1	59	1	29.321	1768.9	103.2	17	15.1	1.18	0.69	20.4	1	1	0	0	0	1
175	1	1	0	1	34	0	30.7958	715.5	80.6	83.5	52.5	2.59	0.7	3.41	1	1	0	0	0	0
114	0	0	0	1	74	1	21.5139	158.8	147.6	15.1	32.1	0.58	0.72	1.42	1	1	0	0	0	0
59	1	0	0	0	64	0	18.662	1584.1	50.9	14	26.8	0.675	0.747	1.248	1	1	0	0	0	1
135	0	0	0	1	70	0	26.6436	747.6	100.4	16.3	26.2	0.97	0.75	2.98	1	1	0	0	0	0
44	1	0	0	1	64	0	23.8751	1283	89.5	19.1	19	0.737	0.772	2.029	1	1	0	1	1	1
107	1	0	0	1	82	1	27.6817	1876.8	281.1	63.4	28.7	1.796	0.781	2.453	1	1	1	0	0	1
142	1	1	0	1	32	1	49.351	707.5	101.7	32.2	30.3	1.13	0.79	2.58	1	1	1	0	1	1
14	1	1	0	0	84	0	24.974	1623	50.6	8.2	10.5	1.282	0.833	2.531	1	1	0	0	0	0
123	0	1	0	1	57	1	26.1224	182.1	72.8	51	24.3	0.73	0.85	2.23	1	1	0	0	0	0
136	0	0	0	1	56	1	22.0386	1044.6	80.6	13	14.6	0.97	0.86	3.32	1	1	0	0	0	0
171	1	1	0	1	31	1	31.5617	901.6	86.3	33.4	22.5	2.33	0.86	2.38	1	1	0	0	0	1
145	1	0	0	1	56	0	19.8347	247.5	68.9	112.8	49.7	1.15	0.88	1.8	1	1	0	0	0	0
158	1	0	0	1	52	1	34.2857	516.4	106.8	33.3	28.7	1.52	0.88	2.06	1	1	0	0	0	0
60	1	0	0	0	74	0	26.6728	725.3	75.6	11.4	15	0.713	0.882	3.155	1	1	1	0	1	1
153	1	0	0	1	56	1	23.1241	1184.3	98.8	98.5	68.2	1.275	0.904	2.454	1	1	0	0	0	0
113	1	0	0	1	84	0	20.898	1238.6	106.9	14.4	19	0.58	0.91	1.47	1	1	0	0	0	0
151	1	1	0	1	87	0	22.0386	695.3	94.7	56.5	40	1.24	0.91	1.97	1	1	0	0	0	0
172	1	0	0	1	50	1	24.5675	3588.3	270	23.8	33.3	2.34	0.91	3.14	1	1	0	0	0	0
150	1	0	0	1	34	0	37.1823	2297.6	121.7	32.2	31.2	1.24	0.92	2.88	1	1	1	0	0	0
109	1	0	0	0	77	0	22.8928	1885.4	77.4	29.6	29.8	0.768	0.954	2.662	1	1	0	0	0	1
149	0	1	0	0	57	0	35.5469	493.3	62	56.2	36.6	1.22	0.96	2.05	1	1	0	0	0	0
138	0	0	0	0	67	0	22.2222	1454	84.1	27.8	19.7	0.98	0.97	1.98	1	1	0	0	0	0
162	1	0	0	0	79	0	30.4832	3695	94.4	76.6	45.2	1.62	1	2.81	1	1	0	0	0	0
12	1	1	0	1	87	0	21.2585	3619.4	97.8	17	31.6	0.953	1.025	2.51	1	1	1	0	0	0
133	0	0	0	1	75	1	20.7612	843.7	63.4	19.2	25.2	0.89	1.03	2.32	1	1	0	0	0	1
157	1	0	0	1	53	1	28.3737	1202.9	95.9	29.2	35.8	1.46	1.04	3.23	1	1	0	0	0	0
167	0	1	0	1	48	0	28.5467	565	104.9	36.4	22.2	2.21	1.04	3.43	1	1	0	0	0	1
39	1	0	0	0	74	0	28.6726	752.5	53.9	25.9	17.9	0.603	1.05	1.69	1	1	1	0	1	1
125	1	1	0	1	78	0	24.0741	294.4	99.6	284.3	256.3	0.79	1.06	1.59	1	1	0	0	0	0
112	1	0	0	0	76	0	25.9691	897.2	67.8	20	41.2	0.56	1.08	2.02	1	1	0	0	0	0
116	1	1	0	1	85	0	20.83	292.2	65.3	28.2	16.6	0.69	1.09	1.7	1	1	0	0	0	0
115	0	0	0	1	71	1	21.9713	975.5	95.2	19.2	22.1	0.68	1.1	2.33	1	1	0	0	0	0
103	0	0	0	1	66	1	23.7118	496.8	84.2	18.2	19.2	1.59	1.11	3.64	1	1	0	0	0	1
128	1	1	0	0	77	0	21.6441	134.1	64.7	7.8	15.1	0.82	1.14	2	1	1	0	0	0	1
89	1	0	0	0	65	0	15.625	3637.8	69.5	87.5	74.5	1.18	1.15	2.62	1	1	0	0	0	0
121	1	0	0	0	69	1	23.6275	648.1	166.2	11.5	28.2	0.73	1.15	3.01	1	1	0	0	0	0
88	1	0	0	0	85	1	17.313	2699.1	70.4	16.9	27.1	0.652	1.169	1.359	1	1	0	0	1	0
117	1	0	0	0	53	0	20.9644	835.5	81.1	22	25.5	0.7	1.17	2.7	1	1	0	0	0	0
160	1	1	0	0	84	0	20.2913	1592	221.6	28.8	45.4	1.57	1.17	1.98	1	1	1	0	0	0
8	1	1	0	1	72	1	23.3887	919.5	128.7	14.8	17.3	1.101	1.175	1.672	1	1	1	0	1	1
161	0	0	0	0	48	0	21.4844	1115	80.3	16.4	21	1.61	1.18	2.95	1	1	0	0	0	0
140	1	1	0	0	84	0	27.4714	489.3	87.5	28.4	30.3	1.02	1.2	1.84	1	1	0	0	0	0
146	0	0	0	1	85	1	32.3232	265.4	108.9	20.5	24.4	1.17	1.2	2.08	1	1	0	0	0	0
137	1	0	0	1	91	0	20.83	1539.4	147.6	10.3	18.4	0.973	1.209	2.5	1	1	0	0	0	0
37	1	0	0	1	79	1	23.8751	2783.3	92	16.1	21.3	1.073	1.212	2.6	1	1	1	0	0	1
62	1	0	0	0	78	0	23.1111	1686	80.8	15.9	25.6	0.904	1.223	3.324	1	1	0	0	0	0
9	1	1	0	0	75	0	27.0552	1260.4	76.2	28.1	18.1	0.683	1.228	1.149	1	1	1	1	1	1
64	1	0	0	0	46	0	29.1749	671.7	81.5	20.8	25.9	1.43	1.24	4.224	1	1	1	0	1	1
30	1	0	0	1	82	1	22.5981	578.5	205.3	16.1	15.6	0.474	1.246	1.426	1	1	1	0	0	0
74	0	0	0	1	62	1	26.6728	2073.9	121.6	15.2	17.8	0.63	1.25	1.217	1	1	0	1	1	0
124	0	0	0	1	58	1	17.6693	151	64	7.5	9.6	0.77	1.26	3.63	1	1	0	0	0	0
16	1	1	0	0	84	1	14.0668	3898.3	87.8	22.1	32.2	1.012	1.27	2.5	1	1	0	0	1	1
127	1	0	0	0	85	0	19.025	911.2	89.5	20.4	26.6	0.81	1.27	2.82	1	1	0	0	0	0
176	0	0	0	1	61	1	23.6614	450.5	82.1	21	26.1	2.703	1.289	3.033	1	1	0	0	0	1
134	1	0	0	0	87	0	26.6667	3153.7	216.5	12.7	29	0.94	1.3	1.83	1	1	0	0	0	0
40	1	0	0	0	88	0	16.6468	454.9	53.6	13.2	22	0.624	1.309	2.033	1	1	1	0	1	1
173	0	0	0	0	57	0	29.9688	116.6	111.2	17	20.9	2.42	1.31	4.26	1	1	0	0	0	0
45	1	0	0	0	81	0	23.0518	522	72.1	31.2	34.8	1.816	1.327	3.025	1	1	1	0	0	1
47	1	0	0	0	76	0	21.4844	424.1	111.1	23.7	35.1	0.801	1.33	2.164	1	1	0	0	1	1
27	1	0	0	1	80	0	23.03	998.8	112.8	13	18.7	0.351	1.342	1.004	1	1	0	0	1	1
87	1	0	0	0	76	0	24.4444	865.4	66.6	24.9	20.6	1.267	1.347	2.967	1	1	1	0	1	1
139	1	1	0	0	77	0	22.8624	7377.2	565.1	3.2	24.1	1	1.42	3.16	1	1	0	0	0	0
86	1	0	0	0	77	0	28.8889	1818.9	64.7	22.8	23.8	1.067	1.444	1.682	1	1	0	0	0	0
154	1	0	0	0	71	0	29.3848	1015.1	74.3	24.3	17.5	1.34	1.48	2.67	1	1	0	0	0	0
55	1	0	0	1	73	1	21.4844	688.7	122.1	11.7	18.3	0.586	1.485	2.465	1	1	1	0	1	0
118	1	0	0	0	90	0	17.7778	1210.2	47.4	16.5	24.9	0.7	1.5	2.86	1	1	0	0	0	0
97	0	0	0	0	91	1	16.409	3015.7	68.8	62.1	45.7	0.863	1.515	2.43	1	1	0	0	0	0
53	1	0	0	1	77	1	24.3911	846.4	75.3	19.9	40.9	0.506	1.53	1.87	1	1	1	0	1	0
129	1	0	0	1	89	1	20.8324	2299.8	102.3	22.3	37.4	0.85	1.53	4.08	1	1	0	0	0	0
100	0	0	0	1	90	1	18.75	713.6	172	31.5	46.7	0.854	1.547	1.594	1	1	0	0	0	0
7	0	1	0	0	73	0	19.9792	490.4	160.3	69	46.1	0.51	1.561	1.403	1	1	0	0	0	1
56	1	0	0	1	43	1	26.8923	450.7	92.3	43	37.7	1.776	1.574	3.893	1	1	0	0	1	0
110	1	0	0	1	79	1	27.9297	457.6	94.3	31.4	36.9	0.94	1.68	1.99	1	1	0	0	0	1
99	0	0	0	0	69	0	31.5556	533	68.1	62.5	58	1.404	1.257	3.668	1	1	0	0	0	1
10	1	1	1	0	74	0	23.3091	1106.3	114.9	17.8	16.8	1.992	0.729	0.976	1	1	1	1	0	1
15	1	1	1	0	83	0	22.6562	729	103.1	43.1	27.8	0.917	0.734	1.432	1	1	0	1	0	1
152	1	0	1	1	67	0	23.8751	1497.2	130.7	27.6	31	1.27	0.96	2.24	1	1	0	0	0	0
98	0	0	1	1	78	1	21.0198	4457.4	184.8	49.5	45.9	0.953	1.038	3.284	1	1	0	0	0	0
33	1	0	1	0	80	0	18.026	1055.1	68.3	40.8	48.6	0.599	1.075	0.918	1	1	1	0	0	0
29	1	0	1	1	70	0	27.6817	974.5	87.6	28.1	41.3	0.799	1.119	1.925	1	1	0	0	1	0
46	1	0	1	0	71	0	14.8213	450.7	72.1	15.7	23.7	1.1	1.271	2.15	1	1	0	0	0	1
58	1	0	1	0	71	0	19.2277	993.9	83.9	42.6	50.1	0.666	1.279	1.3	1	1	0	0	0	1
84	1	0	1	0	99	0	26.6667	1395.1	68	23.2	32.4	0.489	1.632	1.624	1	1	1	0	1	1
			32
